# Supplementary material
Source: PubMed Central journal article supplement (PMC2724887)

## SUPPLEMENTARY DATA

**Appendix table 1a. Proportion reporting fair or poor health in 2004 by socioeconomic indicators and age among people who reported good, very good or excellent health in 2002.**

|                                                         | Age in 2002     | 50-54 | 55-59 | 60-64 | 65-69 | 70-74  | 75-79  | 80+    | Total |
|---------------------------------------------------------|-----------------|-------|-------|-------|-------|--------|--------|--------|-------|
| <b>Household wealth in 2002 (quintiles)</b>             | <b>N = 6371</b> | %     | %     | %     | %     | %      | %      | %      | %     |
| Richest                                                 | 1607            | 7.2   | 6.7   | 5.2   | 11.1  | 8.2    | 22.7   | 15.2   | 9.0   |
| 4th                                                     | 1499            | 6.3   | 11.3  | 10.5  | 12.7  | 12.9   | 12.8   | 23.2   | 11.3  |
| 3rd                                                     | 1349            | 10.0  | 10.9  | 15.3  | 12.7  | 20.4   | 24.8   | 20.2   | 14.9  |
| 2nd                                                     | 1101            | 12.1  | 21.3  | 11.5  | 15.9  | 23.6   | 29.7   | 22.0   | 18.3  |
| Poorest                                                 | 815             | 23.7  | 30.4  | 27.5  | 21.8  | 26.8   | 25.3   | 25.8   | 25.9  |
| Absolute difference between poorest & richest quintiles |                 | 16.5  | 23.7  | 22.3  | 10.7  | 18.6   | 2.6    | 10.6   | 16.9  |
| <b>Equivalised household income in 2002 (quintiles)</b> | <b>N = 6371</b> | %     | %     | %     | %     | %      | %      | %      | %     |
| Richest                                                 | 1629            | 6.7   | 7.0   | 4.8   | 10.8  | 11.3   | 14.5   | 8.7    | 7.6   |
| 4th                                                     | 1435            | 10.5  | 10.7  | 10.4  | 11.6  | 9.4    | 21.5   | 29.1   | 11.9  |
| 3rd                                                     | 1186            | 13.7  | 20.8  | 10.8  | 15.8  | 20.5   | 22.3   | 18.5   | 17.0  |
| 2nd                                                     | 1076            | 12.9  | 14.9  | 19.7  | 19.4  | 21.7   | 23.5   | 28.0   | 20.4  |
| Poorest                                                 | 1045            | 16.5  | 26.5  | 20.0  | 9.9   | 21.0   | 27.2   | 19.8   | 20.2  |
| Absolute difference between poorest & richest quintiles |                 | 9.8   | 19.5  | 15.2  | -0.9  | 9.7    | 12.7   | 11.1   | 12.6  |
| <b>Housing tenure in 2002</b>                           | <b>N = 6414</b> | %     | %     | %     | %     | %      | %      | %      | %     |
| Own outright                                            | 3837            | 8.7   | 9.7   | 10.3  | 12.3  | 15.6   | 23.1   | 20.4   | 13.6  |
| Buying                                                  | 1717            | 8.9   | 12.5  | 8.6   | 18.3  | [24.5] | [14.3] | [22.7] | 11.2  |
| Renting                                                 | 860             | 23.0  | 32.0  | 23.9  | 20.3  | 26.5   | 26.0   | 25.4   | 25.3  |
| Absolute difference between own outright & renting      |                 | 14.3  | 22.3  | 13.6  | 8.0   | 10.9   | 2.9    | 5.0    | 11.7  |

**Appendix table 1b. Proportion reporting fair or poor health or dead by 2004 by socioeconomic indicators and age among people who reported good or very good health in 2002.**

|                                                         | Age in 2002     | 50-54 | 55-59 | 60-64 | 65-69 | 70-74 | 75-79  | 80+    | Total |
|---------------------------------------------------------|-----------------|-------|-------|-------|-------|-------|--------|--------|-------|
| <b>Household wealth in 2002 (quintiles)</b>             | <b>N = 6575</b> | %     | %     | %     | %     | %     | %      | %      | %     |
| Richest                                                 | 1632            | 7.2   | 7.2   | 5.5   | 12.4  | 11.3  | 25.8   | 23.0   | 10.4  |
| 4th                                                     | 1526            | 6.6   | 11.8  | 10.9  | 13.4  | 13.8  | 17.4   | 32.4   | 12.9  |
| 3rd                                                     | 1388            | 10.0  | 11.7  | 16.5  | 15.0  | 23.6  | 28.2   | 30.3   | 17.3  |
| 2nd                                                     | 1143            | 12.1  | 22.7  | 11.5  | 18.7  | 26.6  | 36.6   | 33.0   | 21.3  |
| Poorest                                                 | 886             | 24.3  | 32.6  | 29.8  | 24.6  | 31.8  | 32.1   | 43.5   | 31.8  |
| Absolute difference between poorest & richest quintiles |                 | 17.1  | 25.4  | 24.3  | 12.2  | 20.5  | 6.3    | 20.5   | 21.4  |
| <b>Equalised household income in 2002 (quintiles)</b>   | <b>N = 6575</b> | %     | %     | %     | %     | %     | %      | %      | %     |
| Richest                                                 | 1653            | 6.9   | 8.0   | 4.8   | 11.7  | 15.7  | 17.2   | 23.6   | 9.0   |
| 4th                                                     | 1467            | 10.5  | 11.8  | 11.8  | 13.2  | 12.8  | 28.7   | 37.1   | 13.8  |
| 3rd                                                     | 1220            | 13.7  | 21.2  | 11.2  | 17.0  | 22.2  | 26.9   | 31.8   | 19.3  |
| 2nd                                                     | 1129            | 12.9  | 17.1  | 19.7  | 21.2  | 24.2  | 28.2   | 40.6   | 24.2  |
| Poorest                                                 | 1106            | 17.2  | 26.9  | 21.8  | 14.5  | 24.8  | 32.3   | 31.3   | 24.6  |
| Absolute difference between poorest & richest quintiles |                 | 10.3  | 18.9  | 17.0  | 2.8   | 9.1   | 15.1   | 7.7    | 15.6  |
| <b>Housing tenure in 2002</b>                           | <b>N = 6619</b> | %     | %     | %     | %     | %     | %      | %      | %     |
| Own outright                                            | 3949            | 8.7   | 10.4  | 10.7  | 13.7  | 18.1  | 27.6   | 29.9   | 16.0  |
| Buying                                                  | 1735            | 9.0   | 13.3  | 9.3   | 21.6  | 26.0  | [17.2] | [34.6] | 12.2  |
| Renting                                                 | 935             | 23.6  | 34.1  | 25.9  | 23.6  | 31.5  | 33.6   | 43.4   | 31.3  |
| Absolute difference between own outright & renting      |                 | 14.9  | 23.7  | 15.2  | 9.9   | 13.4  | 6.0    | 13.5   | 15.3  |

**Appendix table 2a. Proportion reporting difficulty with 1+ ADLs in 2004 by socioeconomic indicators and age among people who reported no difficulty with ADLs in 2002.**

|                                                         | Age in 2002     | 50-54 | 55-59 | 60-64 | 65-69 | 70-74 | 75-79  | 80+    | Total |
|---------------------------------------------------------|-----------------|-------|-------|-------|-------|-------|--------|--------|-------|
| <b>Household wealth in 2002 (quintiles)</b>             | <b>N = 6911</b> | %     | %     | %     | %     | %     | %      | %      | %     |
| Richest                                                 | 1655            | 2.0   | 5.0   | 4.0   | 7.1   | 8.4   | 12.8   | 14.7   | 5.9   |
| 4 <sup>th</sup>                                         | 1564            | 4.3   | 6.9   | 7.1   | 8.8   | 16.0  | 21.8   | 24.0   | 9.8   |
| 3rd                                                     | 1431            | 5.7   | 7.5   | 11.3  | 8.7   | 14.6  | 19.7   | 19.0   | 10.6  |
| 2nd                                                     | 1282            | 5.5   | 11.1  | 9.3   | 11.9  | 17.2  | 20.0   | 23.5   | 12.4  |
| Poorest                                                 | 979             | 12.8  | 10.6  | 19.1  | 12.9  | 20.8  | 20.0   | 29.8   | 17.4  |
| Absolute difference between poorest & richest quintiles |                 | 10.8  | 5.6   | 15.1  | 5.8   | 12.4  | 7.2    | 15.1   | 11.5  |
| <b>Equalised household income in 2002 (quintiles)</b>   | <b>N = 6911</b> | %     | %     | %     | %     | %     | %      | %      | %     |
| Richest                                                 | 1692            | 3.0   | 4.9   | 4.8   | 7.8   | 14.1  | 8.8    | 20.0   | 5.7   |
| 4 <sup>th</sup>                                         | 1509            | 6.8   | 10.2  | 10.1  | 8.6   | 11.8  | 21.8   | 20.8   | 10.1  |
| 3rd                                                     | 1291            | 7.9   | 7.5   | 6.7   | 9.1   | 15.3  | 20.2   | 26.5   | 11.1  |
| 2nd                                                     | 1201            | 3.9   | 8.1   | 14.9  | 11.0  | 15.0  | 17.0   | 25.2   | 13.6  |
| Poorest                                                 | 1218            | 7.4   | 9.3   | 9.2   | 10.7  | 19.6  | 21.7   | 21.6   | 14.3  |
| Absolute difference between poorest & richest quintiles |                 | 4.4   | 4.4   | 4.4   | 2.9   | 5.5   | 12.9   | 1.6    | 8.6   |
| <b>Housing tenure in 2002</b>                           | <b>N = 6953</b> | %     | %     | %     | %     | %     | %      | %      | %     |
| Own outright                                            | 4062            | 3.7   | 6.5   | 7.6   | 8.2   | 13.3  | 18.9   | 20.6   | 10.2  |
| Buying                                                  | 1850            | 4.5   | 8.0   | 8.4   | 13.9  | 23.5  | [16.1] | [16.7] | 7.6   |
| Renting                                                 | 1041            | 14.1  | 10.8  | 14.5  | 13.3  | 21.1  | 20.0   | 31.3   | 17.4  |
| Absolute difference between own outright & renting      |                 | 10.4  | 4.3   | 6.9   | 5.1   | 7.8   | 1.1    | 10.7   | 7.2   |

**Appendix table 2b. Proportion reporting difficulty with 1+ ADLs or dead by 2004 by socioeconomic indicators and age among people who reported no difficulty with ADLs in 2002.**

|                                                         | Age in 2002     | 50-54 | 55-59 | 60-64 | 65-69 | 70-74 | 75-79  | 80+    | Total |
|---------------------------------------------------------|-----------------|-------|-------|-------|-------|-------|--------|--------|-------|
| <b>Household wealth in 2002 (quintiles)</b>             | <b>N = 7157</b> | %     | %     | %     | %     | %     | %      | %      | %     |
| Richest                                                 | 1691            | 2.0   | 5.8   | 4.8   | 8.4   | 11.5  | 20.3   | 24.7   | 7.9   |
| 4th                                                     | 1596            | 4.6   | 7.4   | 7.8   | 10.3  | 17.8  | 27.5   | 31.5   | 11.6  |
| 3rd                                                     | 1477            | 5.7   | 8.5   | 12.4  | 11.8  | 18.6  | 24.4   | 31.3   | 13.4  |
| 2nd                                                     | 1332            | 6.2   | 12.5  | 9.8   | 14.9  | 21.6  | 26.2   | 34.2   | 15.7  |
| Poorest                                                 | 1061            | 13.3  | 13.9  | 23.9  | 16.3  | 26.3  | 30.2   | 45.3   | 23.8  |
| Absolute difference between poorest & richest quintiles |                 | 11.3  | 8.1   | 19.1  | 7.9   | 14.8  | 9.9    | 20.6   | 15.9  |
| <b>Equivalised household income in 2002 (quintiles)</b> | <b>N = 7157</b> | %     | %     | %     | %     | %     | %      | %      | %     |
| Richest                                                 | 1720            | 3.4   | 6.0   | 5.2   | 8.7   | 19.4  | 14.8   | 30.8   | 7.3   |
| 4th                                                     | 1547            | 7.1   | 11.4  | 11.7  | 11.1  | 15.5  | 29.9   | 29.6   | 12.3  |
| 3rd                                                     | 1331            | 7.9   | 8.6   | 7.5   | 10.9  | 19.0  | 25.0   | 37.1   | 13.7  |
| 2nd                                                     | 1279            | 3.9   | 10.1  | 15.4  | 13.5  | 18.0  | 23.9   | 37.6   | 17.7  |
| Poorest                                                 | 1280            | 7.9   | 10.3  | 13.2  | 15.1  | 23.5  | 29.0   | 34.5   | 19.6  |
| Absolute difference between poorest & richest quintiles |                 | 4.5   | 3.7   | 8.0   | 6.4   | 4.1   | 14.2   | 3.7    | 12.3  |
| <b>Housing tenure in 2002</b>                           | <b>N = 7199</b> | %     | %     | %     | %     | %     | %      | %      | %     |
| Own outright                                            | 4203            | 3.7   | 7.6   | 8.4   | 10.1  | 16.8  | 24.8   | 30.7   | 13.2  |
| Buying                                                  | 1872            | 4.9   | 8.8   | 10.2  | 17.1  | 25.0  | [21.2] | [21.1] | 8.7   |
| Renting                                                 | 1124            | 14.6  | 13.5  | 17.6  | 17.0  | 26.0  | 30.0   | 46.7   | 23.5  |
| Absolute difference between own outright & renting      |                 | 10.9  | 5.9   | 9.2   | 6.9   | 10.8  | 5.2    | 16.0   | 10.3  |

**Appendix table 3a. Incidence of heart disease between 2002 and 2004 by socioeconomic indicators and age.**

|                                                         | Age in 2002     | 50-54    | 55-59    | 60-64    | 65-69    | 70-74    | 75-79    | 80+      | Total    |
|---------------------------------------------------------|-----------------|----------|----------|----------|----------|----------|----------|----------|----------|
| <b>Household wealth in 2002 (quintiles)</b>             | <b>N = 7171</b> | <b>%</b> |
| Richest                                                 | 1631            | 2.4      | 4.5      | 3.8      | 6.3      | 8.5      | 8.4      | 2.4      | 4.8      |
| 4th                                                     | 1587            | 4.7      | 8.1      | 6.3      | 3.7      | 4.3      | 11.0     | 3.5      | 5.9      |
| 3rd                                                     | 1456            | 4.9      | 7.9      | 4.8      | 9.7      | 7.0      | 5.2      | 3.8      | 6.5      |
| 2nd                                                     | 1374            | 6.7      | 9.4      | 9.7      | 11.4     | 7.8      | 9.6      | 6.1      | 8.7      |
| Poorest                                                 | 1123            | 11.7     | 13.3     | 7.8      | 7.2      | 11.5     | 9.9      | 4.8      | 9.6      |
| Absolute difference between poorest & richest quintiles |                 | 9.3      | 8.8      | 4.0      | 0.9      | 3.0      | 1.5      | 2.4      | 4.8      |
| <b>Equivalised household income in 2002 (quintiles)</b> | <b>N = 7196</b> | <b>%</b> |
| Richest                                                 | 1687            | 3.4      | 3.7      | 2.9      | 5.4      | 8.7      | 3.7      | 3.6      | 4.0      |
| 4th                                                     | 1568            | 3.5      | 4.9      | 2.2      | 6.2      | 5.7      | 8.3      | 4.6      | 4.5      |
| 3rd                                                     | 1373            | 4.6      | 7.3      | 3.9      | 4.7      | 2.1      | 6.0      | 4.3      | 4.7      |
| 2nd                                                     | 1285            | 8.8      | 7.5      | 3.4      | 6.0      | 5.8      | 4.5      | 4.2      | 5.6      |
| Poorest                                                 | 1283            | 3.8      | 7.4      | 3.1      | 5.8      | 3.8      | 5.6      | 1.0      | 4.4      |
| Absolute difference between poorest & richest quintiles |                 | 0.4      | 3.7      | 0.2      | 0.4      | -4.9     | 1.9      | -2.6     | 0.4      |
| <b>Housing tenure in 2002</b>                           | <b>N = 7207</b> | <b>%</b> |
| Own outright                                            | 4166            | 3.7      | 5.0      | 3.2      | 5.6      | 4.3      | 6.1      | 3.0      | 4.5      |
| Buying                                                  | 1861            | 3.5      | 4.4      | 1.9      | 7.0      | 2.0      | [3.3]    | [3.4]    | 3.7      |
| Renting                                                 | 1180            | 7.7      | 10.3     | 3.3      | 4.2      | 7.6      | 3.7      | 3.0      | 5.9      |
| Absolute difference between own outright & renting      |                 | 4.0      | 5.3      | 0.1      | -1.4     | 3.3      | -2.4     | 0        | 1.4      |

**Appendix table 3b. Incidence of heart disease or circulatory-related death between 2002 and 2004 by socioeconomic indicators and age.**

|                                                         | Age in 2002     | 50-54 | 55-59 | 60-64 | 65-69 | 70-74 | 75-79  | 80+    | Total |
|---------------------------------------------------------|-----------------|-------|-------|-------|-------|-------|--------|--------|-------|
| <b>Household wealth in 2002 (quintiles)</b>             | <b>N = 7305</b> | %     | %     | %     | %     | %     | %      | %      | %     |
| Richest                                                 | 1641            | 2.4   | 4.7   | 3.8   | 6.6   | 9.8   | 10.1   | 9.2    | 5.5   |
| 4th                                                     | 1602            | 4.7   | 8.4   | 6.3   | 3.7   | 8.0   | 12.5   | 11.6   | 7.1   |
| 3rd                                                     | 1477            | 4.9   | 7.9   | 6.1   | 10.2  | 10.7  | 7.9    | 12.4   | 8.1   |
| 2nd                                                     | 1404            | 7.0   | 10.1  | 10.6  | 12.4  | 12.1  | 15.7   | 15.4   | 11.2  |
| Poorest                                                 | 1181            | 11.7  | 15.8  | 9.2   | 9.0   | 15.3  | 18.2   | 20.7   | 14.5  |
| Absolute difference between poorest & richest quintiles |                 | 9.3   | 11.1  | 5.4   | 2.4   | 5.5   | 8.1    | 11.5   | 9.0   |
| <b>Equalised household income in 2002 (quintiles)</b>   | <b>N = 7333</b> | %     | %     | %     | %     | %     | %      | %      | %     |
| Richest                                                 | 1695            | 3.4   | 3.9   | 2.9   | 5.4   | 13.8  | 3.7    | 13.3   | 4.7   |
| 4th                                                     | 1584            | 3.7   | 4.9   | 3.2   | 7.0   | 9.7   | 11.5   | 14.1   | 5.8   |
| 3rd                                                     | 1404            | 4.6   | 8.8   | 4.7   | 5.1   | 6.1   | 12.2   | 13.4   | 7.1   |
| 2nd                                                     | 1324            | 8.8   | 8.2   | 3.9   | 6.7   | 8.0   | 9.6    | 14.6   | 8.5   |
| Poorest                                                 | 1326            | 3.8   | 9.3   | 4.3   | 6.9   | 7.4   | 10.2   | 13.8   | 8.2   |
| Absolute difference between poorest & richest quintiles |                 | 0.4   | 5.4   | 1.4   | 1.5   | -6.4  | 6.5    | 0.5    | 3.5   |
| <b>Housing tenure in 2002</b>                           | <b>N = 7341</b> | %     | %     | %     | %     | %     | %      | %      | %     |
| Own outright                                            | 4231            | 4.6   | 8.4   | 6.2   | 7.7   | 9.8   | 11.6   | 12.2   | 8.4   |
| Buying                                                  | 1872            | 4.9   | 6.6   | 6.2   | 10.0  | 5.9   | [12.5] | [18.8] | 6.3   |
| Renting                                                 | 1238            | 11.6  | 15.0  | 8.4   | 8.8   | 17.0  | 17.1   | 20.3   | 14.1  |
| Absolute difference between own outright & renting      |                 | 7.0   | 6.6   | 2.2   | 1.1   | 7.2   | 5.5    | 8.1    | 5.7   |

**SUPP Figure 1a. Odds ratio for income gradient in onset of reporting fair or poor health over two-year period**

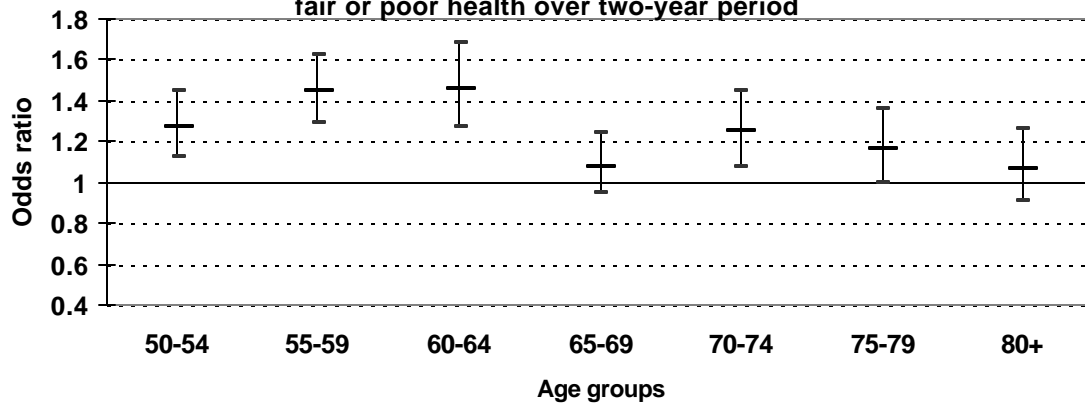

**SUPP Figure 1b. Odds ratio for income gradient in onset of reporting fair or poor health or death over two-year period**

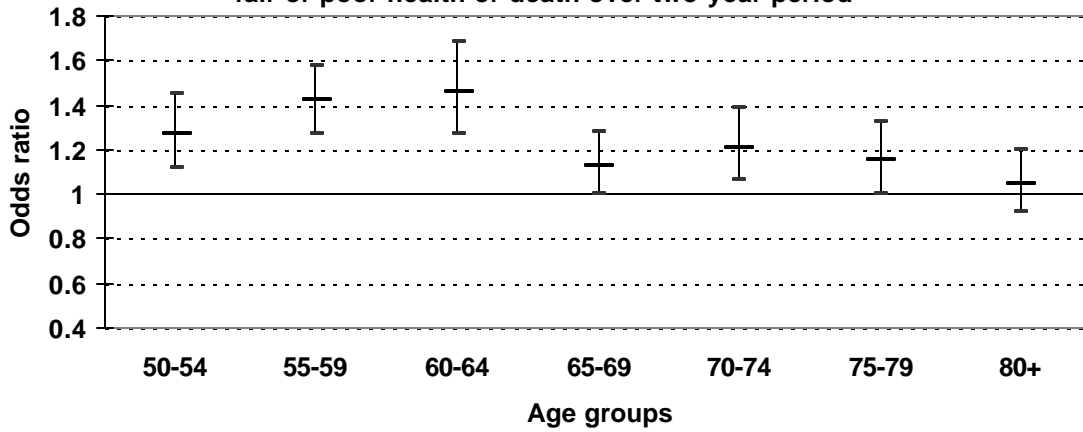

**SUPP Figure 1c. Odds ratio for housing tenure gradient in onset of reporting fair or poor health over two-year period**

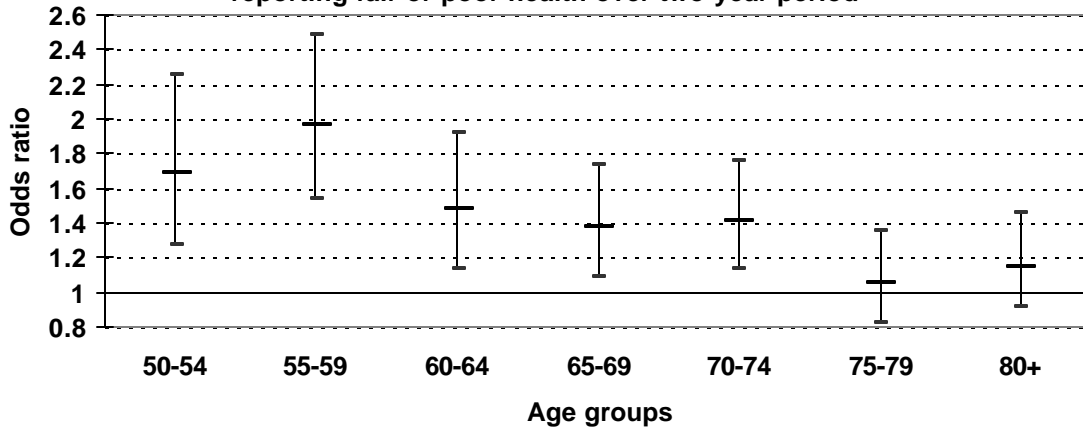

**SUPP Figure 1d. Odds ratio for housing tenure gradient in onset of reporting fair or poor health or death over two-year period**

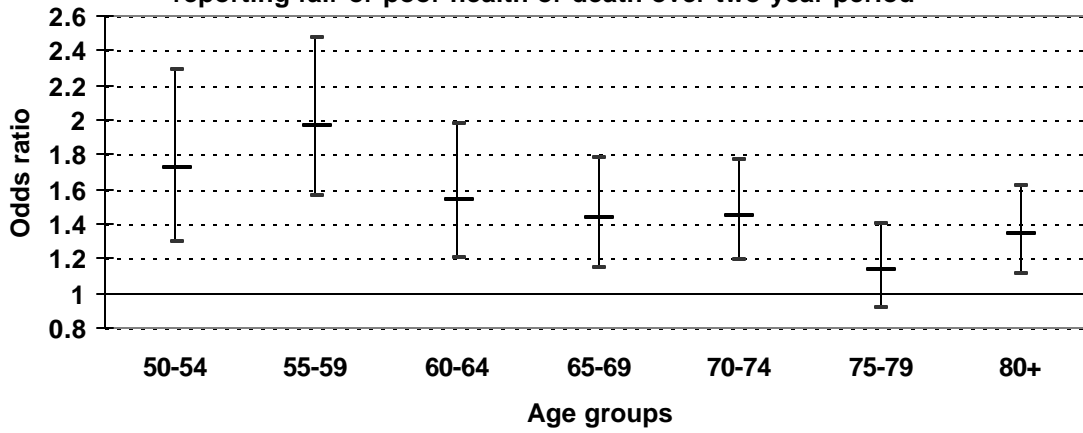

**SUPP Figure 2a. Odds ratio for income gradient in onset of reporting difficulty with 1+ ADL over two-year period**

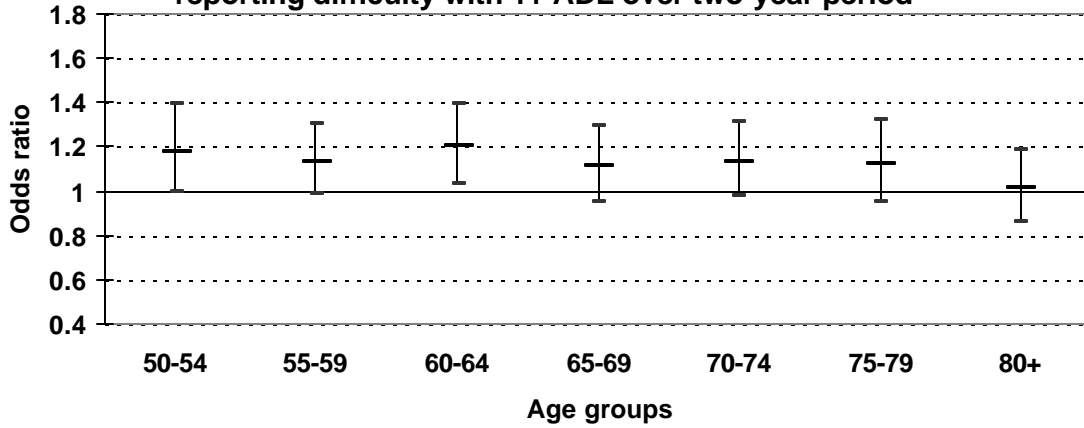

**SUPP Figure 2b. Odds ratio for income gradient in onset of reporting difficulty with 1+ ADL or death over two-year period**

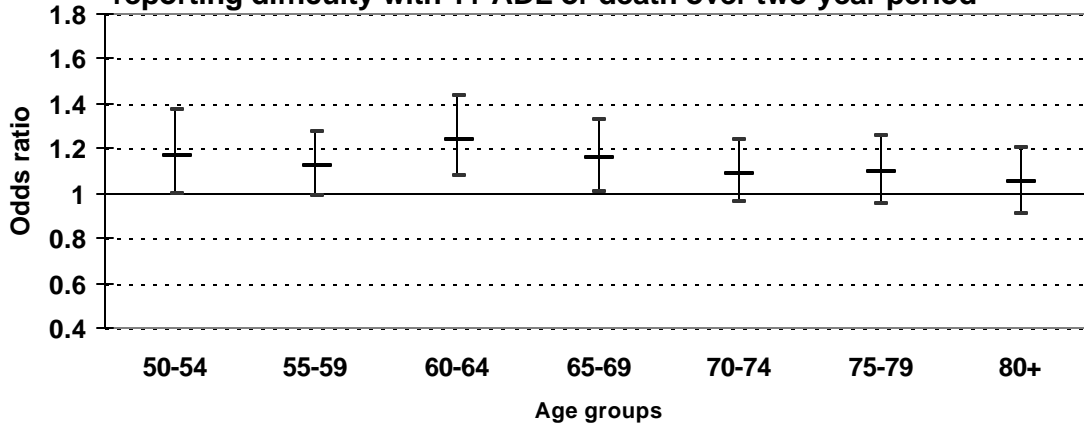

**SUPP Figure 2c. Odds ratio for housing tenure gradient in onset of reporting difficulty with 1+ ADL over two-year period**

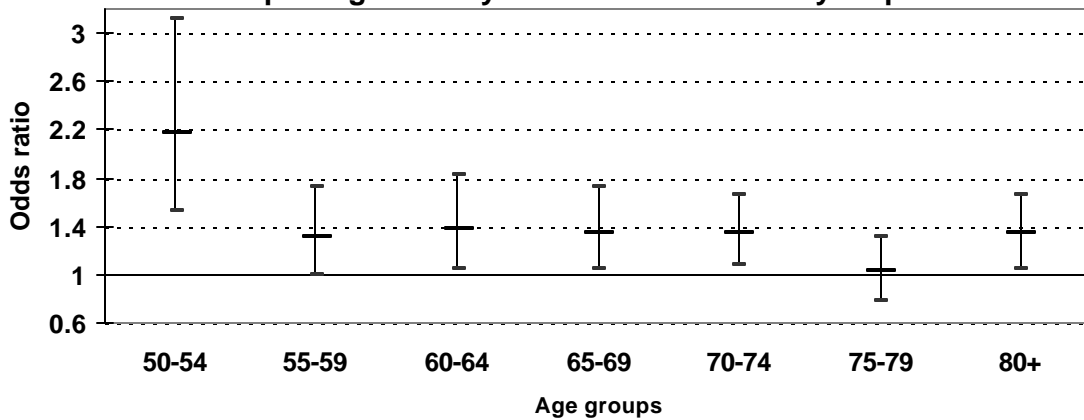



**SUPP Figure 2d. Odds ratio for housing tenure gradient in onset of reporting difficulty with 1+ ADL or death over two-year period**

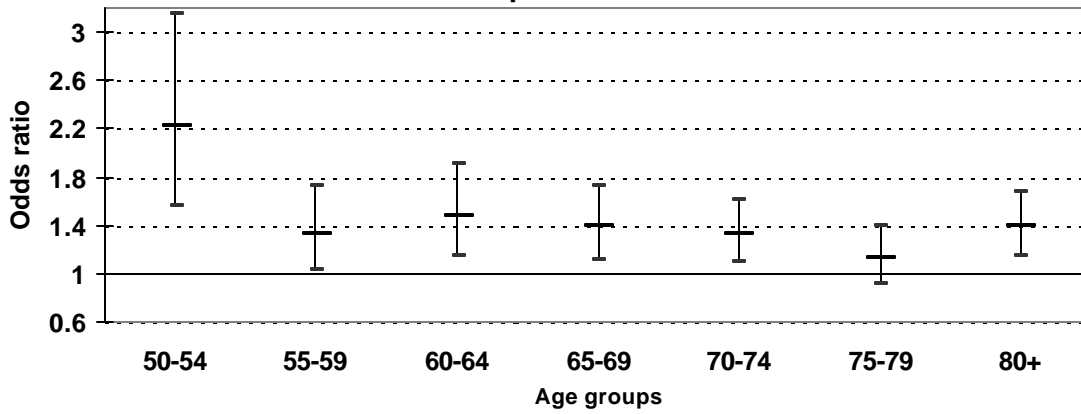

**SUPP Figure 3a. Odds ratio for income gradient in incidence of IHD over two-year period**

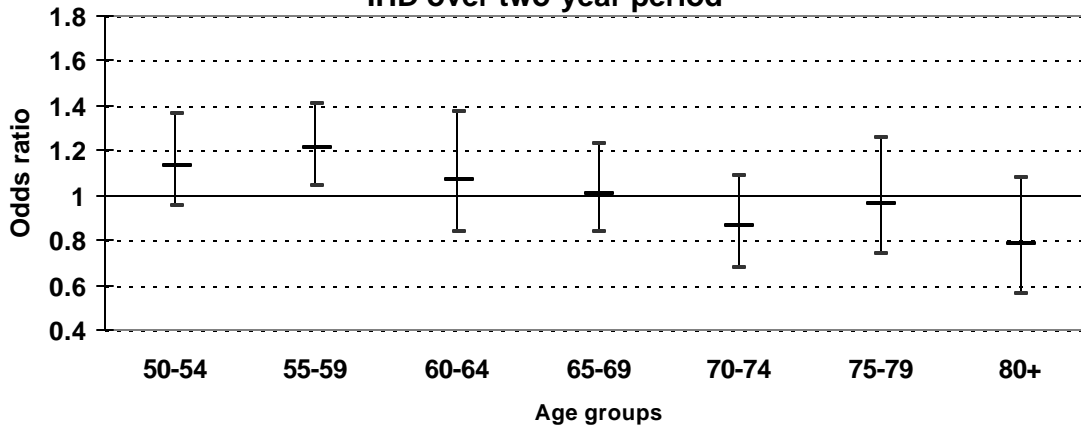

**SUPP Figure 3b. Odds ratio for income gradient in incidence of IHD or circulatory-related death over two-year period**

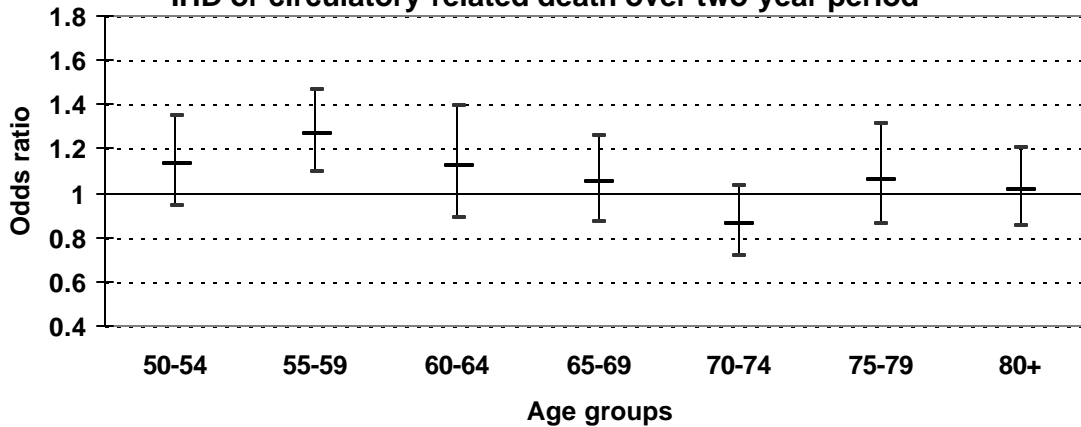

**SUPP Figure 3c. Odds ratio for housing tenure gradient in incidence of IHD over two-year period**

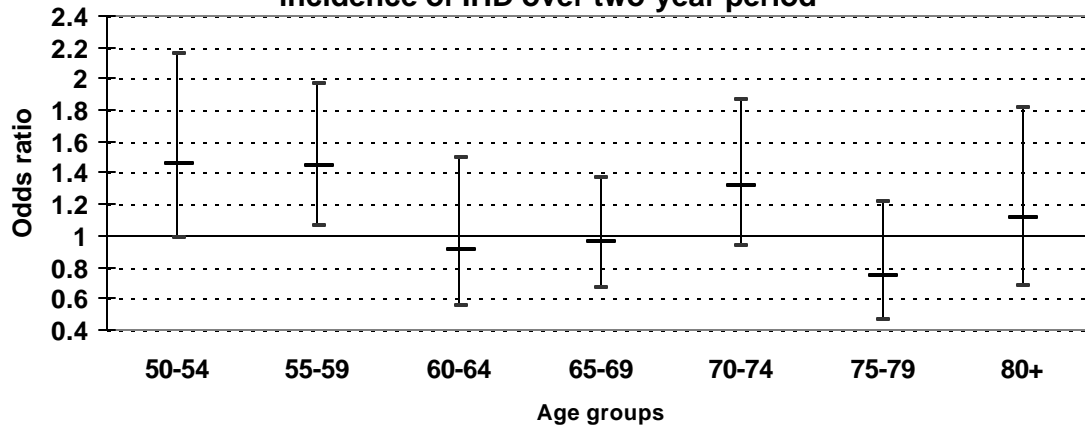

**SUPP Figure 3d. Odds ratio for housing tenure gradient in incidence of IHD or circulatory-related death over two-year period**

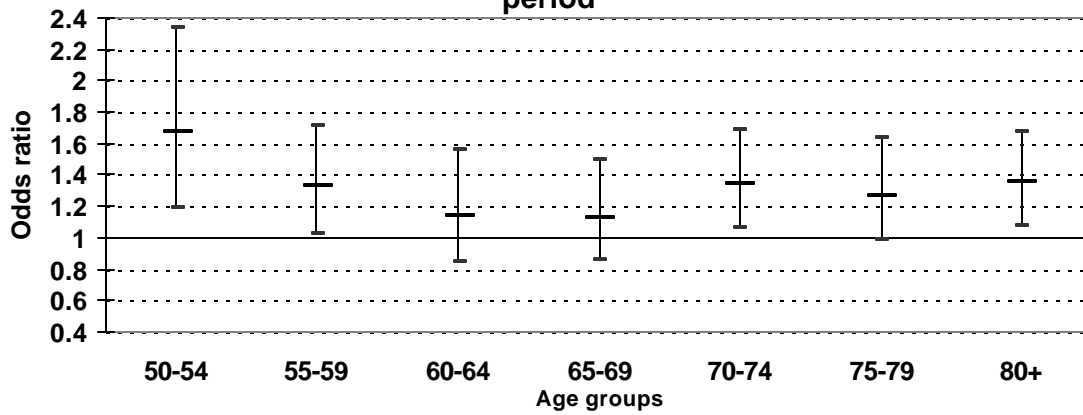

Supplement: afn236_1.pdf [file afn236_1.pdf]
